# Supplementary material
Source: MDPI journal article supplement (https://www.mdpi.com/1999-4907/6/6/1779)
Supplement: s1 [file s1]

Supplementary Information

Appendix

A.1. Process Description of the Vegetation Module

We apply the PnET forest plantation model (derived from the Photosynthetic / EvapoTranspiration model) [1,2] as a module within the LandscapeDNDC model framework [[3](#_ENREF_3)]. As part of the predecessor model Forest-DNDC, this module has been widely used before for short-term (up to several years) simulations for regional inventories of nitrogen trace gas emissions [4–9] but has not yet been evaluated for long-term (decade) carbon and water exchange of the major European tree species. In the following sections we briefly describe the processes and parameters that directly affect forest carbon and water exchange.

A.2. Photosynthesis

The daily amount of C fixed by photosynthesis is simulated in dependence on daily meteorological conditions (solar radiation and temperature), light use efficiency, and leaf area as well as the nitrogen concentration. Climate conditions and leaf area are calculated per canopy layer, defined in dependence on tree height (mature forests perform canopy layers of about 0.5 m vertical extension). The amount of foliage varies between pre-defined minimum and a maximum values. The growth of foliage starts when a threshold of accumulated daily average temperature is exceeded, while it decreases again when net carbon gain turns negative in autumn.

Daily gross photosynthesis is calculated from maximum photosynthetic rate according to [[10](#_ENREF_10)]. It depends on nitrogen concentration and is modified by vapor pressure deficit , temperature , and daylight duration (Equation (A1)). An additional conversion factor (*cf*) is needed to gain carbon assimilation in units kg C·m−2.

|  | (A1) |
| --- | --- |
|  | (A2) |

| **Code** | **Description** | **Units** |
| --- | --- | --- |
| *AMAXF* | fraction of instantaneous early-morning  maximum photosynthesis | (0-1) |
| *BASEFOLRESPF* | Respiration as a fraction of maximum photosynthesis | (0-1) |
| *AMAXA* | Intercept of relation between maximum photosynthetic rate and foliar N | nmol CO2 g−1·s−1 |
| *AMAXB* | Maximal net photosynthetic rate | nmol CO2 g−1·s−1/% N |
| *FolNCon* | Foliage N concentration | % N |

Temperature modification for photosynthesis is based on an optimum function with minimum and maximum daily temperature (, ) as parameters (Equation (A3)). The limitation of photosynthesis at low air humidity is expressed in dependence to water vapor pressure deficit with a saturation curve according to Equation (A4).

|  | (A3) |
| --- | --- |
| )) | (A4) |

With DPV1 and DPV2 representing empirical coefficients.

Maximum gross photosynthesis is used to calculate photosynthesis on leaf and canopy scale by reducing in dependence on light, water availability and leaf biomass per canopy layer.

|  | (A5) |
| --- | --- |

With *lay* being the canopy layer index.

| **Parameter** | **Description** | **Units** |
| --- | --- | --- |
| *Lighteff* | light use efficiency | (0–1) |
| *Wava* | relative available soil water content | % |
| *DWfol* | dry weight of the foliage |  |

The light use efficiency factor depends on photosynthetic active radiation in the specific canopy layer and is calculated from above canopy radiation and foliage distribution as follows:

|  | (A6) |
| --- | --- |
|  | (A7) |

| **Parameter** | **Description** | **Units** |
| --- | --- | --- |
| *I* | radiation intensity | umol m−2·s−1 |
| *LAIlay* | leaf area index | m2·m−2 |
| *EXT* | light extinction (attenuation) coefficient | (0–1) |
| *PAR* | photosynthetic active radiation | umol m−2·s−1 |
| *HALFSAT* | half saturation light intensity | umol m−2·s−1 |

The relative water availability factor is determined from soil water content relative to total soil water holding capacity aggregated over all soil layers and weighted by fine root distribution
(see [[11](#_ENREF_11)]).

|  | (A8) |
| --- | --- |

| **Parameter** | **Description** | **Units** |
| --- | --- | --- |
| *wclay* | Water content in each soil layer | % |
| *Wcmax* | Maximum water content | mm·m−3 |
| *Wcmin* | Minimum water content | mm·m−3 |
| *H2OREF* | relative available soil water content at which stomata conductance is affected (0–1) | (0–1) |
| *Mfrtlay* | species specific fine root biomass per soil layer | kg DW·m−2 |
| *Mfrt* | species specific fine root biomass | kg DW·m−2 |

Photosynthetic activity depends on foliage nitrogen concentration which is calculated from uptake and foliage demand. N uptake is assumed to be the minimum between demand and availability.
The latter is calculated separately in each soil layer from N content of soil solutes, differentiated into NO3 and NH4 using species-specific exploitation factors . These exploitation factors reflect the degree to which the roots are able to deplete the soil available
inorganic N.

|  | (9) |
| --- | --- |

| **Parameter** | **Description** | **Units** |
| --- | --- | --- |
| *EXP_NO3* | species specific-relative explotation rate of NO3 from roots | (0–1) |
| *EXP_NH4* | species specific-relative explotation rate of NH4 from roots | (0–1) |
| *NO3*avai-soil | nitrate in the soil solution | kg N·m−2 |
| *NH4*avai-soil | ammonium in the soil solution | kg N·m−2 |

N taken up from the roots are distributed into the various tree compartments according to their relative demand, using an optimum nitrogen concentration as target value [[12](#_ENREF_12)]. The optimum foliage nitrogen concentration within a specific canopy layer is defined by a fixed optimum concentration which is decreased proportionally to the increase in specific leaf area from top to bottom. Specific leaf area is linearly increased in relation to canopy height [[13](#_ENREF_13)].

|  | (A10) |
| --- | --- |
|  | (A11) |

| **Parameter** | **Description** | **Units** |
| --- | --- | --- |
| *SLAMAX* | specific leaf area in the shade | m2·kg−1 |
| *SLAMIN* | specific leaf area under full light | m2·kg−1 |
| *NCFOLOPT* | optimum nitrogen concentration of foliage | (kg N·kg−1 DW) |
| *ncFolOptlay* | optimum nitrogen concentration per foliage layer | (kg N·kg−1 DW) |
| *hflFolCum* | cumulative height of foliage layers | m |
| *hflFol* | height of a foliage layer | m |

A.3. Respiration

Ecosystem respiration is separately calculated for autotrophic and heterotrophic organisms. Autotrophic organisms (trees) spend energy for growth respiration and maintenance (residual respiration) . The latter is separated by compartments: foliage, fine roots, living wood, and buds. While foliage respiration is defined from photosynthesis calculation
(Equation (A12)), other residual respiration rates are calculated in dependence on biomass and temperature with empirically defined parameters:

|  | (A12) |
| --- | --- |
|  | (A13) |
|  | (A14) |

The carbon allocation into root growth (*RootAllocC*) is originally defined solely in dependence on two empirical parameters (Aber *et al.*, 1992). This has been modified in to respond to average annual temperature in order to get a more general relationship [14–16].

|  | (A15) |
| --- | --- |
|  | (A16) |

| **Code** | **Description** | **Units** |
| --- | --- | --- |
|  | daily root C allocation | g C·m−2 |
|  | ratio of fine root maintenance respiration to biomass production | (0–1) |
|  | growth respiration, fraction of allocation | (0–1) |
|  | temperature factor | (0–1) |
|  | fine root carbon | g C·m−2 |
|  | annual average temperature | °C |
|  | scaling factor for fine root loss | (0–1) |
|  | net canopy photosynthesis | nmol CO2·g−1·s−1 |
|  | wood maintenance respiration as a fraction of gross photosynthesis | (0–1) |

Similarly, C is lost during species specific growth. Foliage , roots , and wood respirations depend on daily biomass and a common species specific parameter.

|  | (A17) |
| --- | --- |
|  | (A18) |
|  | (A19) |

| **Parameter** | **Description** | **Units** |
| --- | --- | --- |
|  | foliage carbon production over the integration timestep | g DW·m−2 |
|  | Wood carbon production over the integration timestep | g DW·m−2 |
|  | root carbon production over the integration timestep | g DW·m−2 |
|  | growth respiration, fraction of allocation |  |

Finally, net photosynthesis is calculated from gross photosynthesis and foliage respiration as a fraction of *Amax* (Equation (A19)). Foliage respiration is differentiated into the light period and the night which both are characterized by their different temperatures.

|  | (A20) |
| --- | --- |
|  | (A21) |
|  | (A22) |

| **Name** | **Description** | **Units** |
| --- | --- | --- |
|  | Respiration as a fraction of maximum photosynthesis | (0–1) |
|  | Q10 for leaf respiration | Unitless |
|  | Average temperature during the nigth | °C |
|  | Average temperature during daylight | °C |
|  | optimum daytime temperature for photosynthesis | °C |
|  | daylight duration | Hours |
|  | night time duration | Hours |

Likewise, heterotrophic organisms spend energy during soil organic matter decomposition processes that are calculated by the DNDC model. The model considers the activity of microbes which decompose litter from three pools and reutilize C from death microbial biomass. In the current study, soil processes are assumed to be valid at any site and are not subject of parameter changes here.
For further descriptions we refer to Li *et al.* (2000) and [[2](#_ENREF_2)].

A.4. Net ecosystem exchange

CO2 exchange between terrestrial biosphere and atmosphere is not directly calculated by PnET-N, however it is presented in the following equation:

|  | (A23) |
| --- | --- |

A.5. Evapotranspiration

Evapotranspiration is the sum of transpiration, evaporation from leaves and from the soil surface.
It is limited by water availability and potential evaporation. Water availability for canopy evaporation is limited by water stored at the leaf surface, which is a function of precipitation, ground coverage, leaf area, and species-specific leaf storage capacity. To account for some water interception of deciduous trees during the leafless period, an additional minimum interception has been defined in dependency on wood biomass.

|  | (A24) |
| --- | --- |
|  | (A25) |
|  | (A26) |
|  | (A27) |

| **Name** | **Description** | **Units** |
| --- | --- | --- |
|  | Actual interception | m·h−1 |
|  | actual rainfall per timestep | m·ts−1 |
|  | density factor | 0–1 |
|  | fraction of ground coverage | 0–1 |
|  | throughfall fraction for a closed canopy | 0–1 |
|  | Woody biomass | kg DW |
|  | species specific leaf area index | m2·m−2 |
|  | specific interception capacity of foliage | (m·m−2 LAI) |
|  | amount of water in canopy layers | mm·m−2 |

Precipitation not intercepted is considered as input to the soil surface. Soil water availability is given by the water stored within 0.3 m or rooting depth for soil evaporation and transpiration, respectively. Water runoff and movement between soil layers depends on water input, soil layer water content, and soil layer specific properties such as field capacity, wilting point, saturated water flow, and clay content. For further description see Kiese *et al.* (2011).

Daily potential evaporation is calculated with a modified Thornthwaite approach [17–19] using daily and mean monthly temperatures as independent variables.

|  | (A28) |
| --- | --- |
|  | (A29) |
|  | (A30) |
|  | (A31) |

| **Name** | **Description** | **Units** |
| --- | --- | --- |
|  | effective temperature for evaporation | °C |
|  | estimated average monthly temperature | °C |
|  | Thornthwaite exponent A | - |
|  | summation of monthly heat index | - |

Potential evaporation is diminished by surface evaporation and the remaining demand is used as an upper boundary for transpiration. Actual transpiration demand or daily potential transpiration is calculated according to the water use efficiency concept (Equation (A28)), which depends on species-specific water use efficiency constants, water availability, and vapor pressure deficit.

|  | (A32) |
| --- | --- |
|  | (A33) |

| **Name** | **Description** | **Units** |
| --- | --- | --- |
|  | maximum water use efficiency constant | mg CO2·g H2O−1 |
|  | minimum water use efficiency constant | mg CO2·g H2O−1 |
|  | soil water content of a soil layer | m·m3 |
|  | height of the soil layer | cm |
|  | minimum water content per soil pore space | m·m−3 |
|  | maximum water content per soil pore space | m·m−3 |
|  | cumulative soil depth | m |

References

1. Li, C.S.; Aber, J.; Stange, F.; Butterbach-Bahl, K.; Papen, H. A process-oriented model of N2O and NO emissions from forest soils: 1. Model development. *J. Geophys. Res. Atmos.* **2000**, *105*,
4369–4384.

2. Stange, F.; Butterbach-Bahl, K.; Papen, H.; Zechmeister-Boltenstern, S.; Li, C.S.; Aber, J.
A process-oriented model of N2O and NO emissions from forest soils 2. Sensitivity analysis and validation. *J. Geophys. Res. Atmos.* **2000**, *105*, 4385–4398.

3. Haas, E.; Klatt, S.; Fröhlich, A.; Kraft, P.; Werner, C.; Kiese, R.; Grote, R.; Breuer, L.; Butterbach-Bahl, K. LandscapeDNDC: A process model for simulation of biosphere-atmosphere-hydrosphere exchange processes at site and regional scale. *Landsc. Ecol.* **2013**, *28*, 615–636.

4. Butterbach-Bahl, K.; Kahl, M.; Mykhayliv, L.; Werner, C.; Kiese, R.; Li, C. A European-wide inventory of soil NO emissions using the biogeochemical models DNDC/Forest-DNDC.
*Atmos. Environ.* **2009**, *43*, 1392–1402.

5. Kesik, M.; Ambus, P.; Baritz, R.; Brüggemann, N.B.; Butterbach-Bahl, K.; Damm, M.;
Duyzer, J.; Horvath, L.; Kiese, R.; Kitzler, B.; *et al*. Inventories of N2O and NO emissions from European forest soils. *Biogeosciences* **2005**, *2*, 353–375.

6. Kiese, R.; Heinzeller, C.; Werner, C.; Wochele, S.; Grote, R.; Butterbach-Bahl, K. Quantification of nitrate leaching from German forest ecosystems by use of a process oriented biogeochemical model. *Environ. Pollut.* **2011**, *159*, 3204–3214.

7. Kiese, R.; Li, C.S.; Hilbert, D.W.; Papen, H.; Butterbach-Bahl, K. Regional application of
PnET-N-DNDC for estimating the N2O source strength of tropical rainforests in the Wet Tropics of Australia. *Glob. Chang. Biol.* **2005**, *11*, 128–144.

8. Kesik, M.; Brüggemann, N.; Forkel, R.; Kiese, R.; Knoche, R.; Li, C.; Seufert, G.; Simpson, D.; Butterbach-Bahl, K. Future scenarios of N2O and NO emissions from European forest soils.
*J. Geophys. Res. Biogeosci.* **2006**, *111*, doi:10.1029/2005JG000115.

9. Butterbach-Bahl, K.; Stange, F.; Papen, H.; Li, C.S. Regional inventory of nitric oxide and
nitrous oxide emissions for forest soils of southeast Germany using the biogeochemical model PnET-N-DNDC. *J. Geophys. Res. Atmos.* **2001**, *106*, 34155–34166.

10. Aber, J.D.; Federer, C.A. A generalized, lumped-parameter model of photosynthesis, evapotranspiration and net primary production in temperate and boreal forest ecosystems. *Oecologia* **1992**, *92*, 463–474.

11. Grote, R.; Lavoir, A.V.; Rambal, S.; Staudt, M.; Zimmer, I.; Schnitzler, J.P. Modelling the drought impact on monoterpene fluxes from an evergreen Mediterranean forest canopy. *Oecologia* **2009**, *160*, 213–223.

12. Grote, R. Integrating dynamic morphological properties into forest growth modelling: II. Allocation and mortality. *For. Ecol. Manag.* **1998**, *111*, 193–210.

13. Grote, R.; Korhonen, J.; Mammarella, I. Challenges for evaluating process-based models of gas exchange at forest sites with fetches of various species. *For. Syst.* **2011**, *20*, 389–406.

14. Chen, W.; Zhang, Q.; Cihlar, J.; Bauhus, J.; Price, D.T. Estimating fine-root biomass and production of boreal and cool temperate forests using aboveground measurements: A new approach. *Plant Soil* **2004**, *265*, 31–46.

15. Finér, L.; Ohashi, M.; Noguchi, K.; Hirano, Y. Fine root production and turnover in forest ecosystems in relation to stand and environmental characteristics. *For. Ecol. Manag.* **2011**, *262*, 2008–2023.

16. Yuan, Z.Y.; Chen, H.Y.H. Fine Root Biomass, Production, Turnover Rates, and Nutrient Contents in Boreal Forest Ecosystems in Relation to Species, Climate, Fertility, and Stand Age: Literature Review and Meta-Analyses. *Crit. Rev. Plant Sci.* **2010**, *29*, 204–221.

17. Pereira, A.R.; Pruitt, W.O. Adaptation of the Thornthwaite scheme for estimating daily reference evapotranspiration. *Agric. Water Manag.* **2004**, *66*, 251–257.

18. Camargo, A.P.; Marin, F.R.; Sentelhas, P.C.; Picini, A.G. Adjust of the Thornthwaite’s method to estimate the potential evapotranspiration for arid and superhumid climates, based on daily temperature amplitude. *Rev. Bras. Agrometeorol.* **1999**, *7*, 251–257.

19. Thornthwaite, C.W.; Mather, J.R. Instructions and tables for computing potential evapotranspiration and the water balance. *Climatology* **1957**, *10*, 185–311.
